# Supplementary material for: Neutrophils direct preexisting matrix to initiate repair in damaged tissues
Source: PubMed Central journal article supplement (PMC8986538; doi:10.1038/s41590-022-01166-6), 2022-03-30

GAPDH

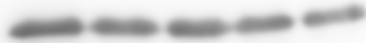

Kindlin3

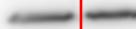

GAPDH

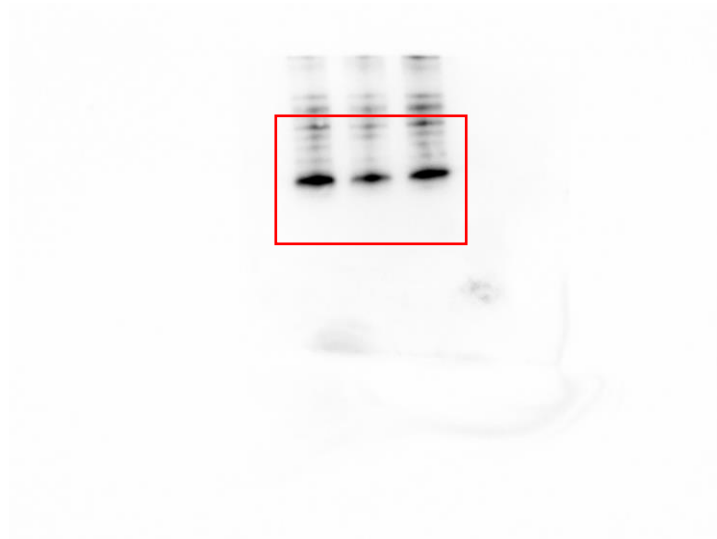

pHSF

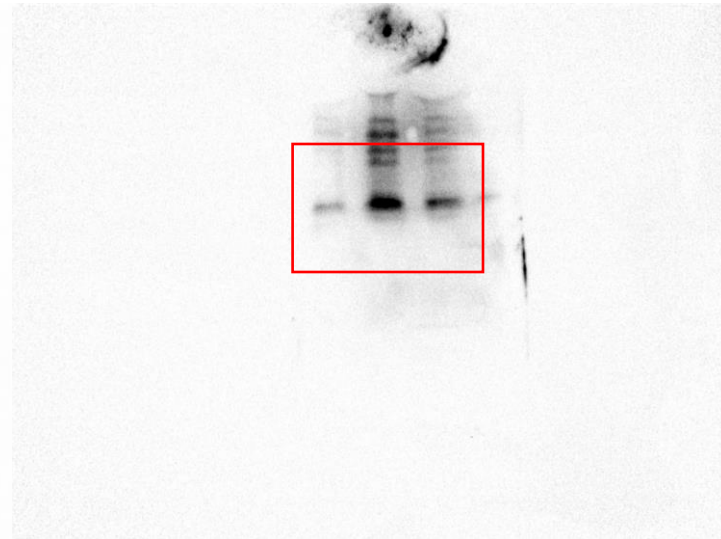

rat

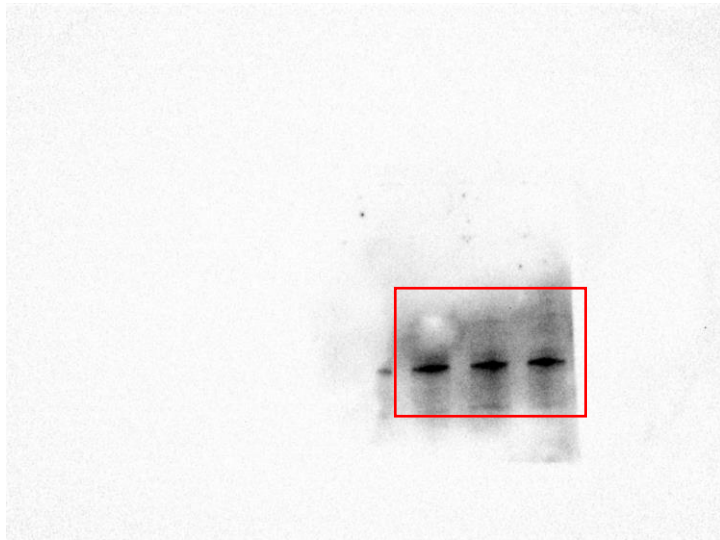

ITGAM

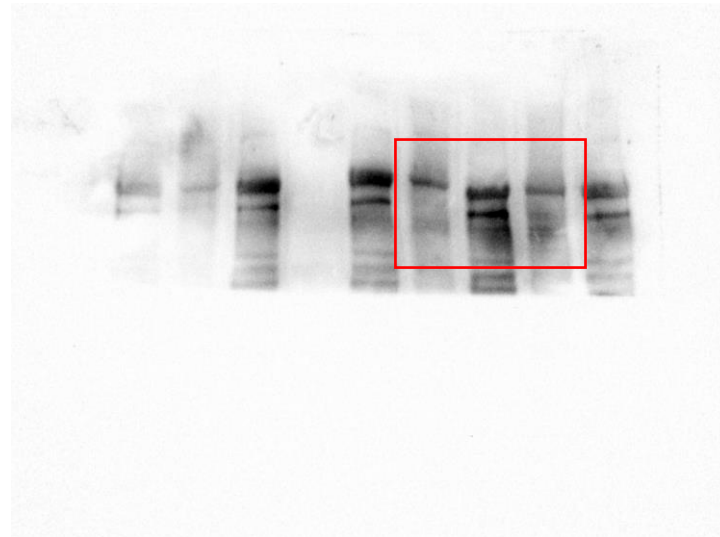

ITGb2

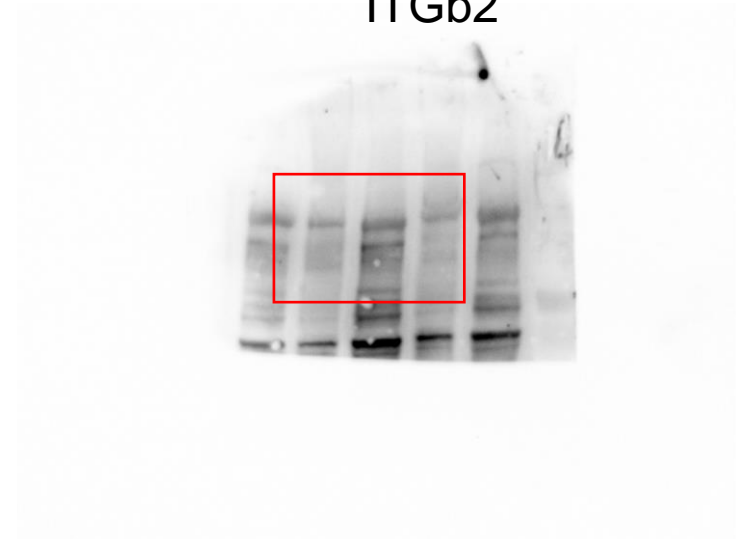

Supplement: 41590_2022_1166_MOESM28_ESM.pdf [file 41590_2022_1166_MOESM28_ESM.pdf]
